# Supplementary material
Source: PubMed Central journal article supplement (PMC5798384)
Supplement: pnas.201719834SI.pdf [file pnas.201719834SI.pdf]

# Supporting Information

Gorelik et al. 10.1073/pnas.1719834115

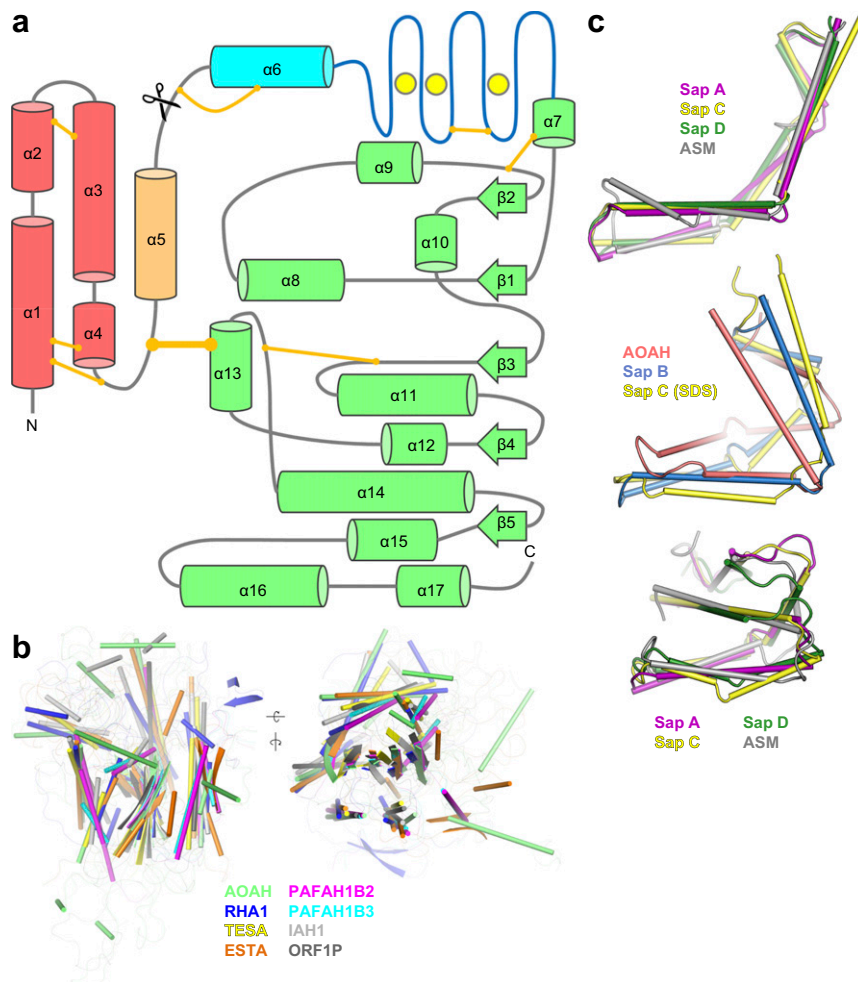

**Fig. S1.** AOA structure and comparison with structurally related proteins. (A) Topology of AOA, with  $\alpha$ -helices (cylinders),  $\beta$ -strands (arrows), disulfide bonds (orange connectors), and calcium ions (yellow spheres). The size of secondary structure elements is proportional to sequence length. The native proteolytic processing site is marked by scissors. The saposin domain is shown in red, the saposin extension in orange, the esterase domain in green, the calcium-binding region in dark blue, and the amphipathic helix in cyan. (B) Superimposition of the AOA esterase domain with other GDSL esterases: rhamnolacturonan acetyltransferase (RHA1) from *Aspergillus aculeatus* (PDB ID code 1DEO, 16% identity, rmsd of 4.8 Å over 306 main-chain atoms); thioesterase 1/protease 1/lysophospholipase L1 (TESA) from *E. coli* (PDB ID code: 1IVN, 26% identity, rmsd of 4.8 Å over 440 main-chain atoms); human platelet-activating factor acetylhydrolase IB subunit  $\beta$  (PAFAH1B2) (PDB ID code: 1VYH, 17% identity, rmsd of 2.4 Å over 75 main-chain atoms from helices and strands); bovine platelet-activating factor acetylhydrolase IB subunit  $\gamma$  (PAFAH1B3) (PDB ID code: 1WAB, 15% identity, rmsd of 1.9 Å over 73 main-chain atoms from helices and strands); autotransporter esterase EstA (ESTA) from *Pseudomonas aeruginosa* (PDB ID code: 3KVN, 12% identity, rmsd of 4.2 Å over 304 main-chain atoms); isoamyl acetate-hydrolyzing esterase (IAH1) from *Saccharomyces cerevisiae* (PDB ID code: 3MIL, 20% identity, rmsd of 5.2 Å over 486 main-chain atoms); zebrafish esterase from retrotransposon Zfl2-1 (ORF1P) (PDB ID code: 4C1B, 20% identity, rmsd of 3.7 Å over 403 main-chain atoms). Additional domains of the homologs and the saposin domain of AOA are hidden for clarity. (C) The saposin domain of AOA is compared with the open conformation structures of saposin A (PDB ID code: 4DDJ), B (PDB ID code: 1N69), C (PDB ID code: 2QYP), C in a detergent environment (PDB ID code: 1SN6), D (PDB ID code: 5U85), and the saposin domain of acid sphingomyelinase (ASM) (PDB ID code: 5FIB). The closed forms of saposin A (PDB ID code: 2DOB), C (PDB ID code: 1M12), and D (PDB ID code: 2RB3) and the saposin domain of acid sphingomyelinase (PDB ID code: 5F19) are also displayed.

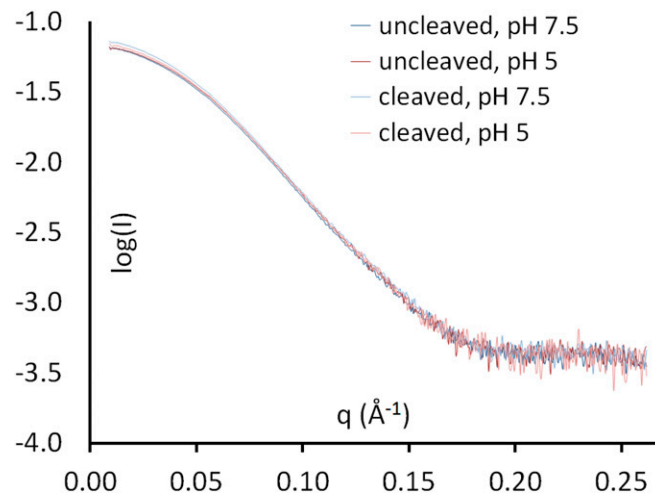

**Fig. 52.** X-ray scattering by AOAH in solution. The X-ray scattering profile from SEC-SAXS experiments for uncleaved or cleaved human AOAH under different conditions.



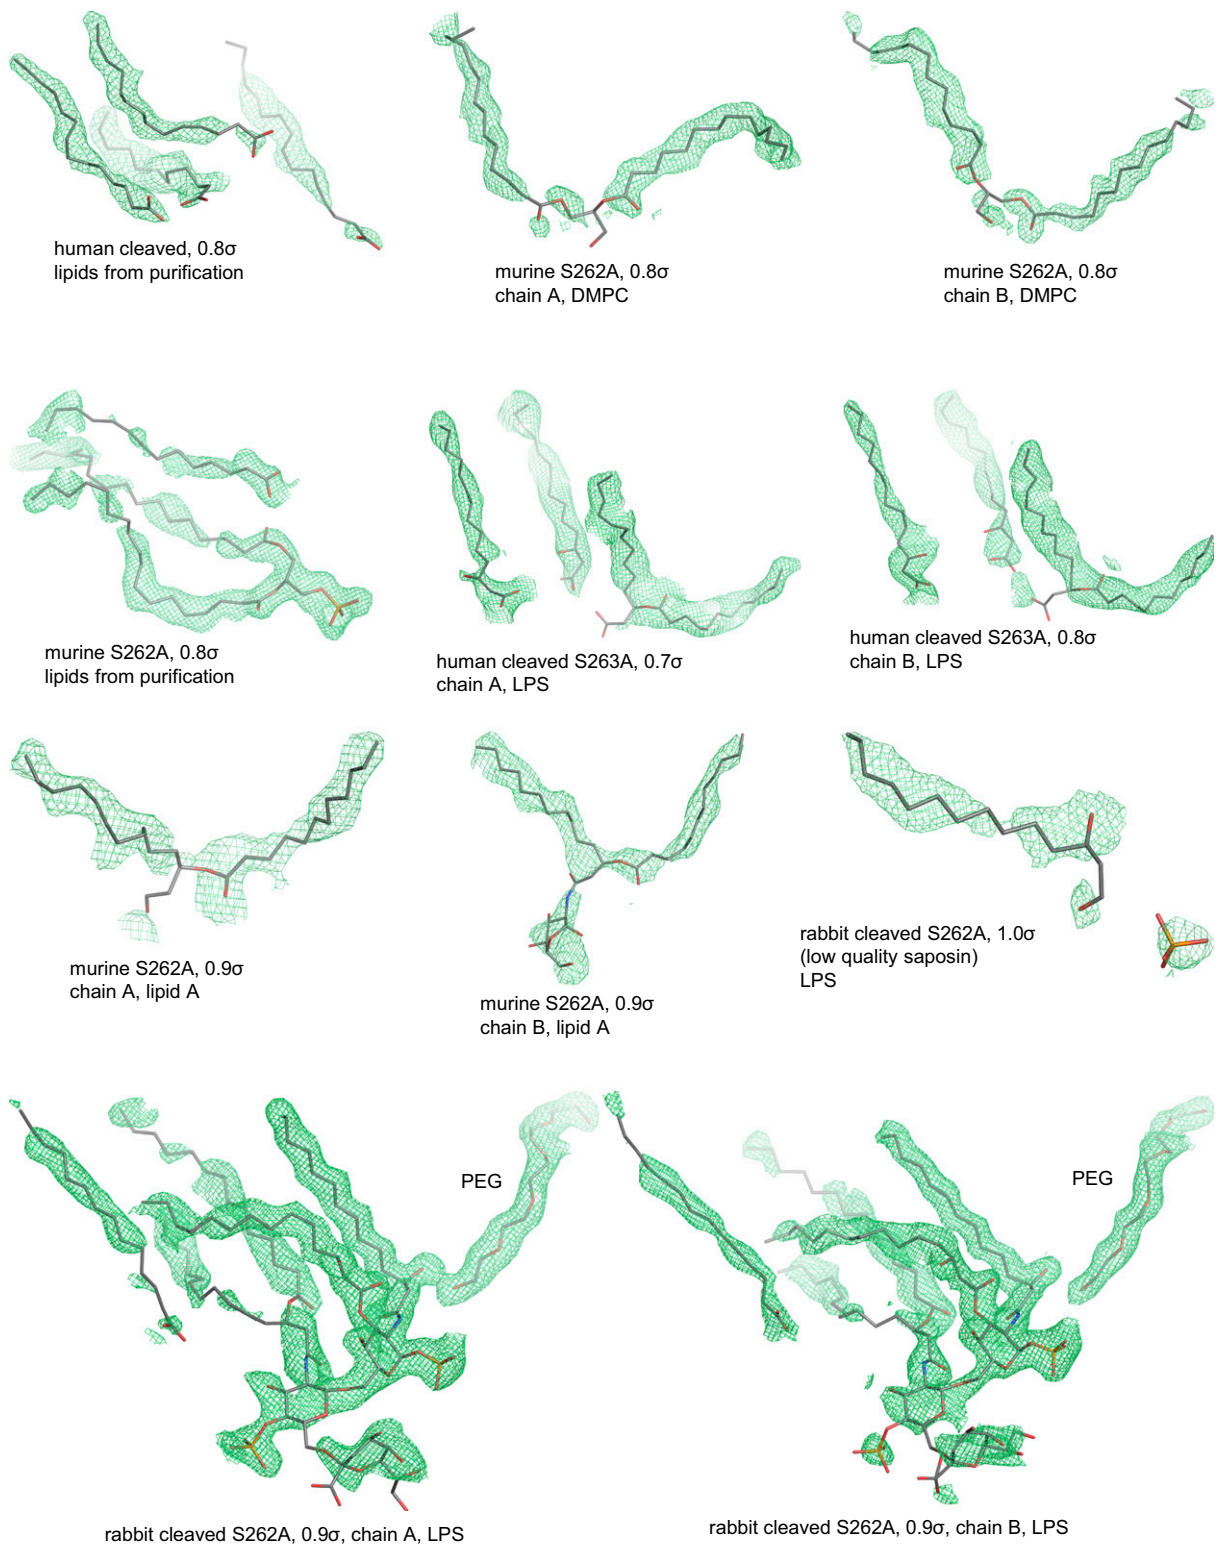

**Fig. S4.** Electron density maps of lipids and related ligands.  $2F_o - F_c$  electron density maps are contoured at the indicated  $\sigma$  level. All maps were generated before the addition of ligands to the models. Most ligands are only partially visible in the electron density. Lipids carried over from the purification are modeled as free fatty acids or phosphatidic acid.



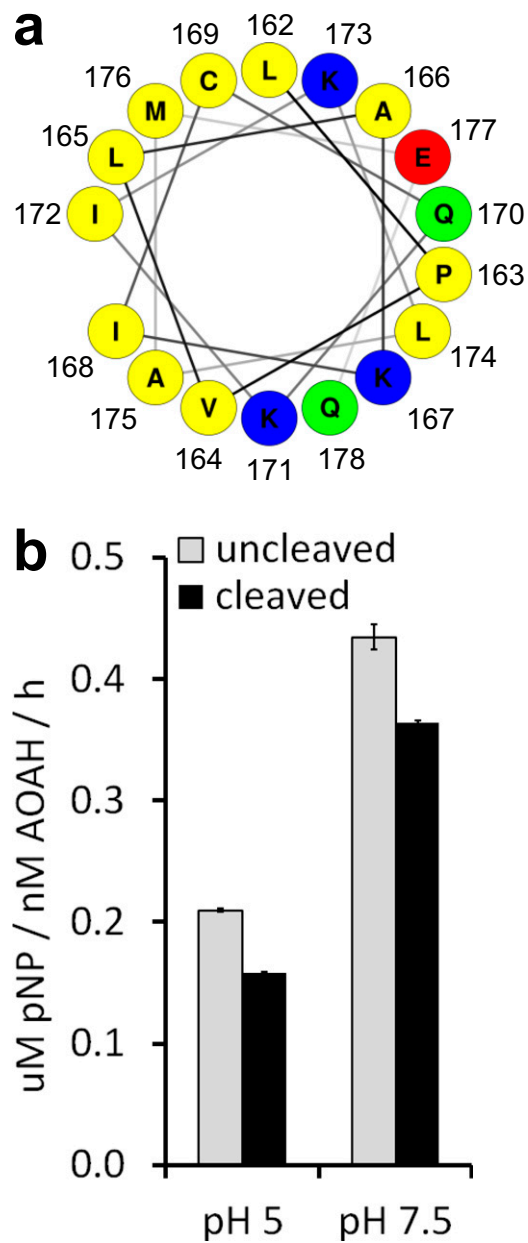

**Fig. S7.** Amphipathic helix of AOA. (*A*) A helical wheel representation of the human AOA amphipathic helix with residues colored by type: hydrophobic, yellow; polar, green; cationic, blue; and anionic, red. The diagram was created by the NetWheels server. (*B*) The effect of proteolytic processing on enzymatic activity against the small molecule substrate p-nitrophenyl acetate was assayed at different pHs. Data are the mean  $\pm$  SD of three replicates representative of one of two experiments. pNP, p-nitrophenol.









**Table S2. Predicted impact of missense SNPs in AOA1**

|                     |                   |                     |                     |                   |                   |                         |                   |       |       |
|---------------------|-------------------|---------------------|---------------------|-------------------|-------------------|-------------------------|-------------------|-------|-------|
| Probably benign     |                   |                     |                     |                   |                   |                         |                   |       |       |
| S36L                | V48L              | V48M                | V50A                | I51V              | L54F              | N59D (glycan loss)      |                   | S60L  | S60W  |
| T61M (glycan loss)  |                   | Q63R                | A64T                | M66T              | Y72N              | P74L                    | P74T              | F78L  | L79M  |
| I87N                | K96Q              | S99R                | A100T               | A104T             | H109Y             | L111Q                   | E112V             | F113S | K115E |
| T118A               | T118P             | Q120R               | P121Q               | P121T             | H124Q             | L128P                   | E131K             | Q138R | K139E |
| Q142K               | S147F             | S147Y               | P148L               | L150V             | S153Y             | P163L                   | A166T             | M176V | Q178E |
| Q178H               | S179A             | K183E               | V192I               | F193S             | W201R             | D210N (glycan gain)     |                   | E211K | R218G |
| H225R               | P238T             | V242I               | P243L               | F248L             | G251D             | G251V                   | P254R             | I257N | A264V |
| A266G               | H267Y             | I270V               | S271C               | T276A             | S278L             | M280V                   | N283K             | L292F | L301V |
| G303Y               | A304T             | T311S               | I314F               | K317R             | R322H             | L323F                   | W324R             | R345Q | I351L |
| S353G               | L354S             | Y362H               | A364T               | V366I             | I367T             | M370L                   | I371T             | V375G | V375L |
| S377N               | G378R             | S380I               | P382T               | M386I             | L392R             | N395S                   | V396I             | L400M | L407M |
| N409D (glycan loss) |                   | L415F               | Y416H               | P419A             | T422N             | T422S                   | D426N             | H429R | R431K |
| Q437L               | K440E             | M442V               | A445V               | S449F             | F450V             | G461C                   | G461S             | S464F | T473A |
| K485R               | L498V             | Y500C               | Y500H               | M501V             | A504S             | H506R                   | E507G             | G516D | P519L |
| L522F               | E524Q             | N532S               | A535S               | A540V             | W544R             | K546N                   | K546Q             | Q548R | W551C |
| E558Q               | P560L             | D571H               |                     |                   |                   |                         |                   |       |       |
| Uncertain impact    |                   |                     |                     |                   |                   |                         |                   |       |       |
| Q56R                | L69P              | Y126C               | R197Q               | P219L             | G235D             | D237H                   | D240N             | H269D | W274R |
| N287S               | N287T             | P289S (glycan gain) |                     | E295D             | E295K             | D297V                   | R322C             | R322S | D333H |
| N340H               | N357Y             | D361N               | M397T (glycan gain) |                   | R431S             | G436S                   | Y444C             | A445P | W462R |
| T468M (glycan loss) |                   | Q479P               | N497S (glycan gain) |                   | E533K             | G574R                   |                   |       |       |
| Probably harmful    |                   |                     |                     |                   |                   |                         |                   |       |       |
| C41S (disulfide)    |                   | C108R (disulfide)   |                     | C123W (disulfide) |                   | D186N (calcium binding) |                   | R197W |       |
| R202Q               | R202L             | R202W               | R204G               | S263L (catalysis) |                   | L296P                   | T305I             | S318Y | R322P |
| R326I               | N327S             | C329R (disulfide)   |                     | R356G             | D361Y             | T387P                   | G436V             | R470W | S474L |
| G517R               | D527Y (catalysis) |                     | D527V (catalysis)   |                   | H530Q (catalysis) |                         | H530Y (catalysis) |       |       |

Human AOA1 missense variants found in the dbSNP database are categorized according to their predicted impact on the enzyme's fold, stability, or function, with specific effects in parentheses. Predictions are based on the crystal structure as well as sequence conservation in vertebrates.
